# Supplementary material
Source: PubMed Central journal article supplement (PMC4633880)
Supplement: rspb20151970supp1.pdf [file rspb20151970supp1.pdf]

**Table S1** Studies documenting sex ratio variation in mosquitofish (*Gambusia affinis* and *G. holbrooki*).

| Reference | Species          | Country        | Approx Coordinates         | Proportion Males |
|-----------|------------------|----------------|----------------------------|------------------|
| [1]       | <i>holbrooki</i> | France         | 43.533333, 4.5             | 0.974424552      |
| [1]       | <i>holbrooki</i> | France         | 43.533333, 4.5             | 0.39941691       |
| [2]       | <i>holbrooki</i> | Spain          | 40.671905, 0.594952        | 0.082725061      |
| [2]       | <i>holbrooki</i> | Spain          | 40.671905, 0.594957        | 0.71             |
| [3]       | <i>holbrooki</i> | Spain          | 37.000567, -6.415229       | 0.317291736      |
| [4]       | <i>holbrooki</i> | Hungary        | 46.7833333, 017.2000000    | 0.205882353      |
| [4]       | <i>holbrooki</i> | Hungary        | 46.7833333, 017.2000000    | 0.95             |
| [5]       | <i>holbrooki</i> | Spain          | 42.33, 3.1                 | 0.111            |
| [5]       | <i>holbrooki</i> | Spain          | 42.33, 3.1                 | 1                |
| [6]       | <i>affinis</i>   | Dongguan,China | 23.0241694°, 113.7544444°  | 0.786516854      |
| [6]       | <i>affinis</i>   | Dongguan,China | 23.0241694°, 113.7544444°  | 0.30952381       |
| [7]       | <i>holbrooki</i> | Spain/Portugal | 38.5500000, -007.2666667   | 0.248447205      |
| [7]       | <i>holbrooki</i> | Spain/Portugal | 38.5500000, -007.2666667   | 0.481848185      |
| [8]       | <i>affinis</i>   | Iraq           | 47.75, 30.5                | 0.292207792      |
| [9]       | <i>holbrooki</i> | Tasmania       | -41.3850000°, 147.0733333° | 0.156985871      |
| [9]       | <i>holbrooki</i> | Tasmania       | -41.3850000°, 147.0733333° | 0.877192982      |
| [10]      | <i>affinis</i>   | LA, USA        | 30, -090.0955556           | 0.066666667      |
| [10]      | <i>affinis</i>   | LA, USA        | 30, -090.0955556           | 0.5              |
| [11]      | <i>holbrooki</i> | Florida, USA   | 30.2126950, -084.1784900   | 0.877192982      |
| [11]      | <i>holbrooki</i> | Florida, USA   | 30.2126950, -084.1784900   | 0.447619048      |
| [12]      | <i>holbrooki</i> | Turkey         | 37.0605556, 035.3255556    | 0.347222222      |
| [12]      | <i>holbrooki</i> | Turkey         | 37.0605556, 035.3255556    | 0.746268657      |
| [13]      | <i>holbrooki</i> | Australia      | -.27.416692, 153.019472    | 0.518172378      |
| [14]      | <i>holbrooki</i> | Greece         | 39.6666667°, 020.8833333°  | 0.238095238      |
| [14]      | <i>holbrooki</i> | Greece         | 39.6666667°, 020.8833333°  | 0.548387097      |
| [15]      | <i>affinis</i>   | NM, USA        | 33.4772583°, -104.3908389° | 0.790322581      |
| [15]      | <i>affinis</i>   | NM, USA        | 33.4772583°, -104.3908389° | 0.098360656      |
| [16]      | <i>affinis</i>   | Japan          | 34.0702694°, 134.5548444°  | 0.073490814      |
| [16]      | <i>affinis</i>   | Japan          | 34.0702694°, 134.5548444°  | 0.396907216      |
| [17]      | <i>holbrooki</i> | India          | 29.4000000°, 079.4666667°  | 0.163934426      |
| [17]      | <i>holbrooki</i> | India          | 29.4000000°, 079.4666667°  | 0.62962963       |
| [18]      | <i>holbrooki</i> | Iran           | 37.9666667°, 053.1166667°  | 0.317204301      |
| [19]      | <i>holbrooki</i> | Bulgaria       | 42.3862639°, 025.4324556°  | 0.527027027      |
| [19]      | <i>holbrooki</i> | Bulgaria       | 42.3862639°, 025.4324556°  | 0.207792208      |
| [20]      | <i>affinis</i>   | LA, USA        | 30.2265944°, -093.2173750° | 0.489361702      |
| [20]      | <i>affinis</i>   | LA, USA        | 30.2265944°, -093.2173750° | 0.224299065      |
| [21]      | <i>affinis</i>   | Kansas, USA    | 37.5581028°, -097.2489583° | 0.13253012       |
| [21]      | <i>affinis</i>   | Kansas, USA    | 37.5581028°, -097.2489583° | 0.428571429      |
| [22]      | <i>holbrooki</i> | Italy          | 45.4428917°, 011.7072472°  | 0.91             |
| [22]      | <i>holbrooki</i> | Italy          | 45.4428917°, 011.7072472°  | 0.39             |

|                        |                |                  |                            |             |
|------------------------|----------------|------------------|----------------------------|-------------|
| [23]                   | <i>affinis</i> | Illinois, USA    | 41.7870417°, -087.8104972° | 0.978021978 |
| [23]                   | <i>affinis</i> | Illinois, USA    | 41.7870417°, -087.8104972° | 0.156985871 |
| (Fryxell, D.F. 2014) * | <i>affinis</i> | California, USA  | 37.3074556°, -118.3448167° | 0.05        |
| (Fryxell, D.F. 2014) * | <i>affinis</i> | California, USA  | 37.3074556°, -118.3448167° | 0.45        |
| (Fryxell, D.F. 2014) * | <i>affinis</i> | North Island, NZ | -37.2006639°, 175.3402194° | 0.79        |
| (Fryxell, D.F. 2014) * | <i>affinis</i> | North Island, NZ | -38.4519806°, 176.1580472° | 0.19        |

\* Unpublished data

## References

1. Britton, R. H. & Moser, M. E. 1982 Size specific predation by herons and its effect on the sex-ratio of natural populations of the mosquito fish *Gambusia affinis* Baird and Girard. *Oecologia* **53**, 146–151. (doi: 10.1007/BF00545657).
2. Vargas, M. J. & de Sostoa, A. 1996 Life history of *Gambusia holbrooki* (Pisces, Poeciliidae) in the Ebro delta (NE Iberian peninsula). *Hydrobiologia* **341**, 215–224. (doi:10.1007/BF00014686)
3. Fernández-Delgado, C. 1989 Life-history patterns of the mosquito-fish, *Gambusia affinis*, in the estuary of the Guadalquivir river of south-west Spain. *Freshw. Biol.* **22**, 395–404. (doi: 10.1111/j.1365-2427.1989.tb01113.x).
4. Specziár, A. 2004 Life history pattern and feeding ecology of the introduced eastern mosquitofish, *Gambusia holbrooki*, in a thermal spa under temperate climate, of Lake Hévíz, Hungary. *Hydrobiologia* **522**, 249–260. (doi:10.1023/B:HYDR.0000029978.46013.d1)
5. Alcaraz, C. & García-Berthou, E. 2007 Life history variation of invasive mosquitofish (*Gambusia holbrooki*) along a salinity gradient. *Biol. Conserv.* **139**, 83–92. (doi:10.1016/j.biocon.2007.06.006)
6. Xie, Y. P., Fang, Z. Q., Hou, L. P. & Ying, G. G. 2010 Altered development and reproduction in western mosquitofish (*Gambusia affinis*) found in the Hanxi River, southern China. *Environ. Toxicol. Chem.* **29**, 2607–2615. (doi:10.1002/etc.321)
7. Pérez-Bote, J. L. & López, M. T. 2005 Life-history pattern of the introduced eastern mosquitofish, *Gambusia holbrooki* (Baird & Girard, 1854), in a Mediterranean-type river: The River Guadiana (SW Iberian Peninsula). *Ital. J. Zool.* **72**, 241–248. (doi:10.1080/11250000509356678)
8. Al-Daham, N. K., Huq, M. F. & Sharma, K. P. 1977 Notes on the ecology of fishes of the genus *Aphanius* and *Gambusia affinis* in Southern Iraq. *Freshw. Biol.* **7**, 245–251. (doi:10.1111/j.1365-2427.1977.tb01672.x)
9. Keane, J. P. & Neira, F. J. 2004 First record of mosquitofish, *Gambusia holbrooki*, in Tasmania, Australia: Stock structure and reproductive biology. *New Zeal. J. Mar. Freshw. Res.* **38**, 857–867. (doi:10.1080/00288330.2004.9517285)
10. Haynes, J. L. & Cashner, R. C. 1995 Life history and population dynamics of the western mosquitofish: a comparison of natural and introduced populations. *J. Fish Biol.* **46**, 1026–1041. (doi:10.1111/j.1095-8649.1995.tb01407.x)

11. Martin, R. G. 1975 Sexual and aggressive behavior, density and social structure in a natural population of mosquitofish, *Gambusia affinis holbrooki*. *Copeia* , 445–454. (doi: 10.2307/1443641).
12. Erguden, S. A. 2013 Age, growth, sex ratio and diet of eastern mosquitofish *Gambusia holbrooki* Girard, 1859 in Seyhan Dam Lake (Adana/Turkey). *Iran. J. Fish. Sci.* **12**, 204–218.
13. Milton, D. A. & Arthington, A. H. 1983 Reproductive biology of *Gambusia affinis holbrooki* Baird and Girard, *Xiphophorus helleri* (Gunther) and *X. maculatus* (Heckel) (Pisces; Poeciliidae) in Queensland, Australia. *J. Fish Biol.* **23**, 23–41. (doi:10.1111/j.1095-8649.1983.tb02879.x)
14. Gkenas, C., Oikonomou, A., Economou, A., Kiosse, F. & Leonardos, I. 2012 Life history pattern and feeding habits of the invasive mosquitofish, *Gambusia holbrooki*, in Lake Pamvotis (NW Greece). *J. Biol. Res. - Thessaloniki* **17**, 121–136.
15. Swenton, D. M. & Kodric-Brown, A. 2012 Habitat and life history differences between two species of *Gambusia*. *Environ. Biol. Fishes* **94**, 669–680. (doi:10.1007/s10641-011-9973-1)
16. Sato, H. 1989 Ecological studies on the mosquito fish, *Gambusia affinis* for encephalitis control with special reference to selective feeding on mosquito larvae and competition with the medaka, *Oryzias latipes*. *Japanese J. Trop. Med. Hyg.* **17**, 157–173. (doi:10.2149/tmh1973.17.157)
17. Singh, N. & Gupta, P. K. 2014 Reproductive biology of eastern mosquito fish *Gambusia holbrooki* (Girard) (Poeciliidae) in a sub-tropical Lake , Lake Nainital (India). *Int. J. Curr. Microbiol. Appl. Sci.* **3**, 19–31.
18. Patimar, R., Ghorbani, M., Gol-Mohammadi, A. & Azimi-Glugahi, H. 2011 Life history pattern of mosquitofish *Gambusia holbrooki* (Girard, 1859) in the Tajan River (Southern Caspian Sea to Iran). *Chinese J. Oceanol. Limnol.* **29**, 167–173. (doi:10.1007/s00343-011-0110-y)
19. Zarev, V. Y. 2012 Some life-history traits of *Gambusia holbrooki* (Pisces: Poeciliidae) from Bulgaria. *Acta Zool. Bulg.* **64**, 263–272.
20. Daniels, G. L. & Felley, J. D. 1992 Life history and foods of *Gambusia affinis* in two waterways of southwestern Louisiana. *Southwest. Nat.* **37**, 157–165. (doi: 10.2307/3671664).
21. Brown, K. L. 1987 Colonization by mosquitofish (*Gambusia affinis*) of a Great Plains river basin. *Copeia* , 336–351. (doi: 10.2307/1445769).
22. Zulian, E., Bisazza, A. & Marin, G. 1995 Variations in male body size in natural populations of *Gambusia holbrooki*. *Ethol. Ecol. Evol.* **7**, 1–10.
23. Krumholz, L. 1948 Reproduction in the western mosquitofish, *Gambusia affinis affinis* (Baird & Girard), and its use in mosquito control. *Ecol. Monogr.* **18**, 1–43.

**Table S2** See additional supplementary xlsx file.

**Table S3** We determined whether fish biomass explained a significant amount of variation in a subset of responses within the grouped sex ratio treatments “male-biased” and “female biased” using linear regression. Responses chosen were those showing the strongest sex ratio effects.

| Group         | Response                  | Week | R <sup>2</sup> | Slope  | p     |
|---------------|---------------------------|------|----------------|--------|-------|
| Female-biased | Phytoplankton Abundance   | 2    | 0.074          | 1.540  | 0.393 |
| Female-biased | NPP                       | 2    | 0.008          | 0.066  | 0.772 |
| Female-biased | pH                        | 2    | 0.036          | 0.104  | 0.555 |
| Female-biased | Temperature               | 2    | -0.080         | 0.281  | 0.679 |
| Female-biased | Crustacean Zoop Abundance | 4    | 0.112          | -0.860 | 0.287 |
| Male-biased   | Phytoplankton Abundance   | 2    | 0.193          | 1.921  | 0.153 |
| Male-biased   | NPP                       | 2    | 0.001          | -0.021 | 0.909 |
| Male-biased   | pH                        | 2    | 0.003          | 0.028  | 0.861 |
| Male-biased   | Temperature               | 2    | 0.014          | 0.248  | 0.714 |
| Male-biased   | Crustacean Zoop Abundance | 4    | 0.008          | 0.443  | 0.782 |

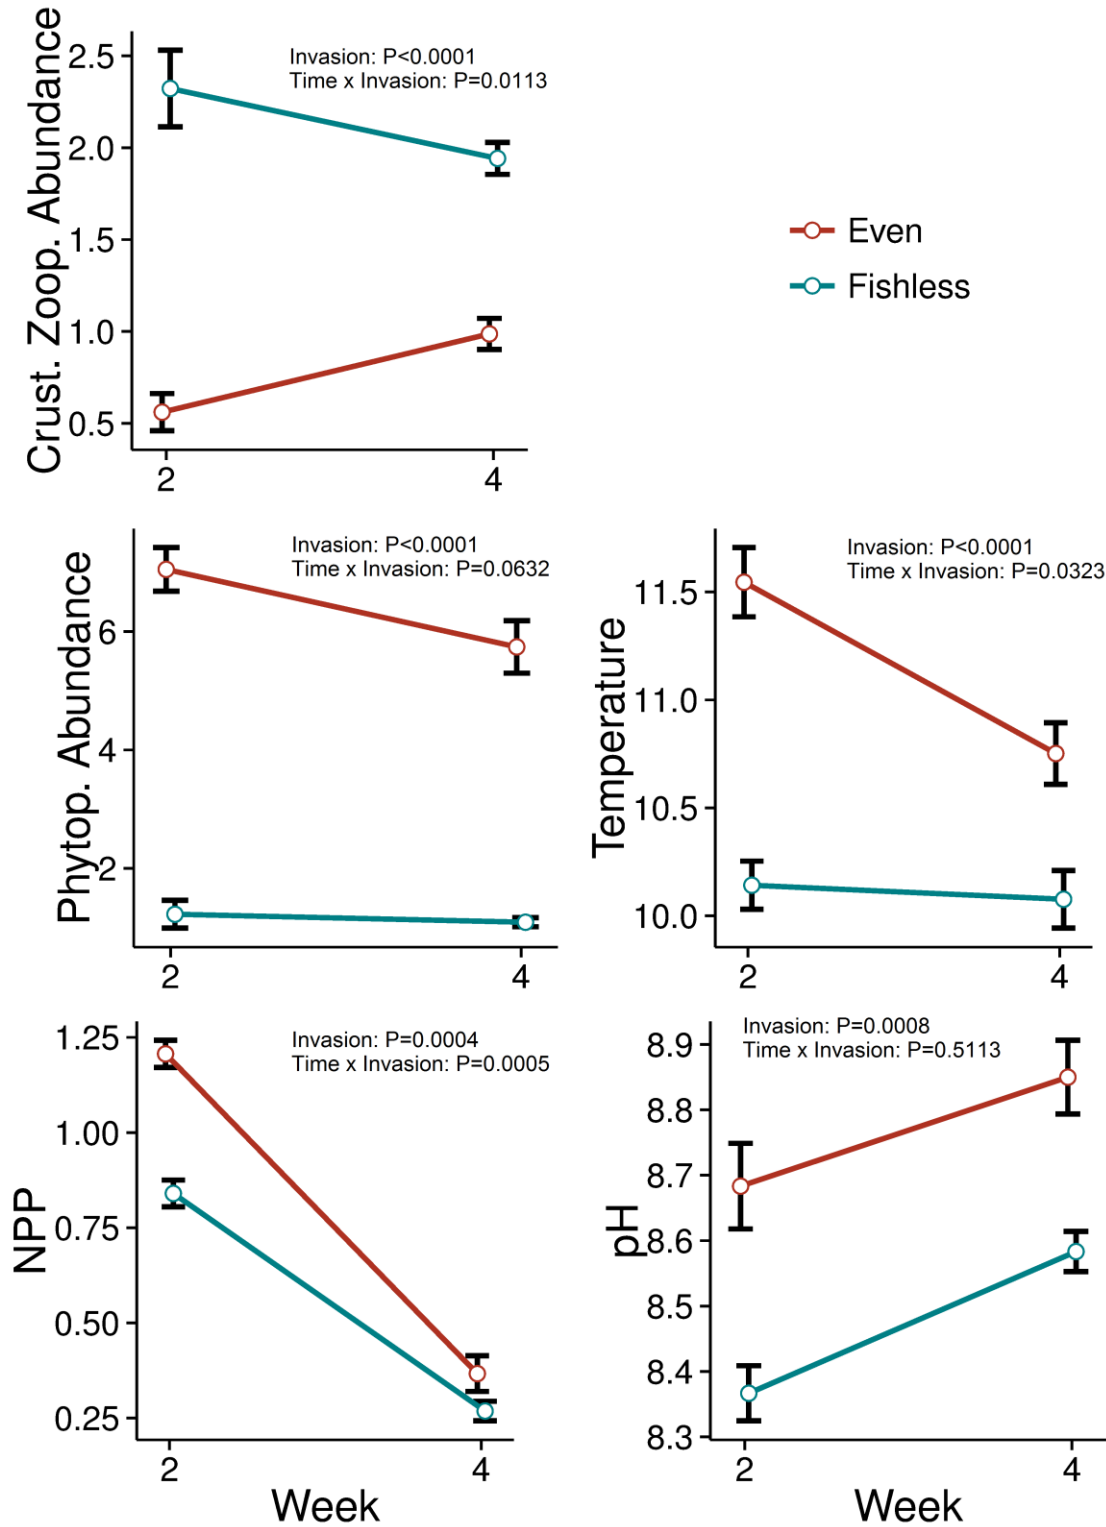

**Figure S1** Pelagic responses (mean  $\pm$  SE) for the fishless treatment (blue) and even sex ratio treatment (red). Significance is reported for Invasion and Time\*Invasion effects from the MANOVA of repeated measures.

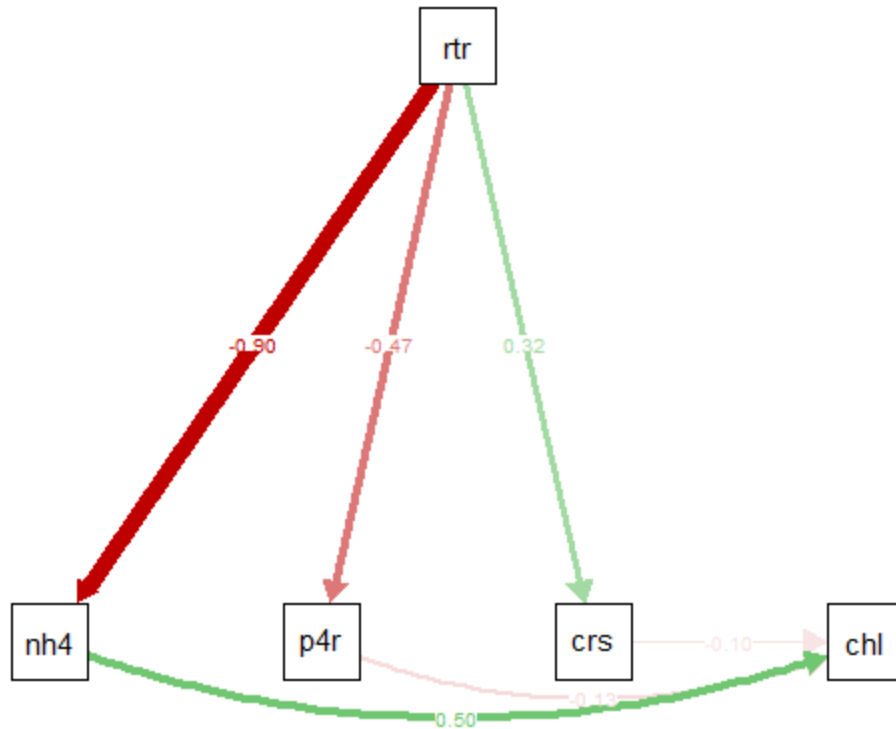

**Figure S2** A directed graph showing results from a path analysis where phytoplankton abundance (chl<sub>a</sub>) at week 2 is affected by the number of crustacean zooplankton (crs), the amount of fish N excretion (nh<sub>4</sub>), and the amount of fish P excretion (p<sub>4r</sub>). Inclusion of realized sex ratio treatment (rtr, measured as proportion males) shows that sex ratio had a large effect on N excretion, a significant but smaller effect on P excretion, and only a slight effect on zooplankton (at week 2). This analysis was performed to investigate the potential cause of the week 2 sex ratio effect on the trophic cascade given the lack of a sex ratio effect on crustacean zooplankton abundance at week 2. This analysis was based on standardized data from all treatments with fish, performed in R using the package lavaan, and plotted using the package SEMplot. The only significant effect on phytoplankton abundance ( $\alpha=0.10$ ) was that of N excretion ( $p=0.014$ ). We do not think this analysis implies that N was the limiting nutrient for phytoplankton. However, we think N excretion was a better proxy for overall nutrient excretion than was P excretion because estimates of P excretion in our experiment were highly variable.

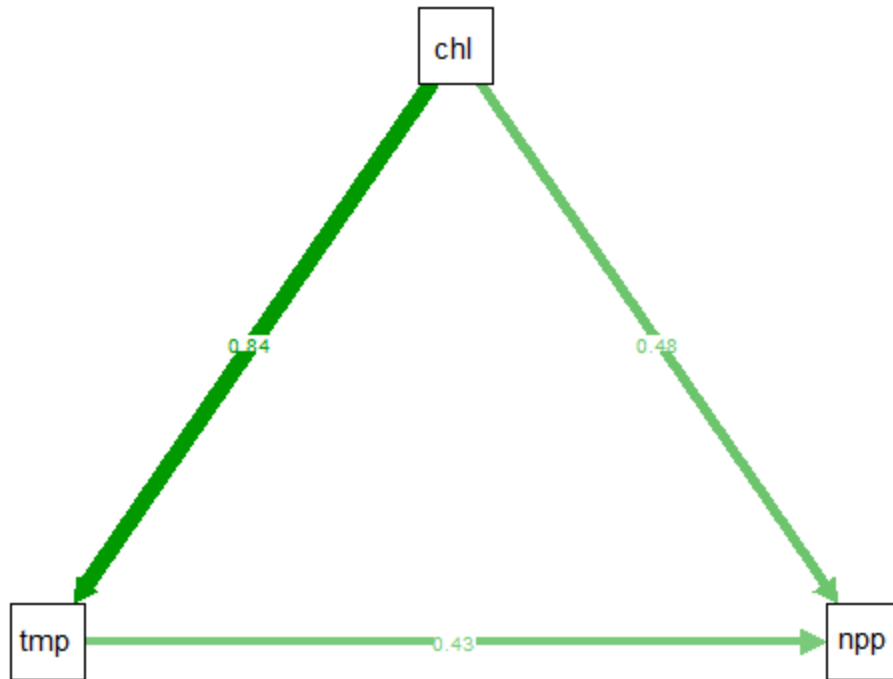

**Figure S3** A directed graph showing the results from a path analysis where phytoplankton abundance (chl<sub>a</sub>) affects NPP directly and indirectly through its effect on temperature (tmp). This analysis was based on standardized data from all treatments at week 2, performed in R using the package lavaan, and plotted using the package SEMplot. P-values for each arrow (i.e. parameter estimates for predictors in the underlying regressions) were significant at an  $\alpha=0.005$  level.

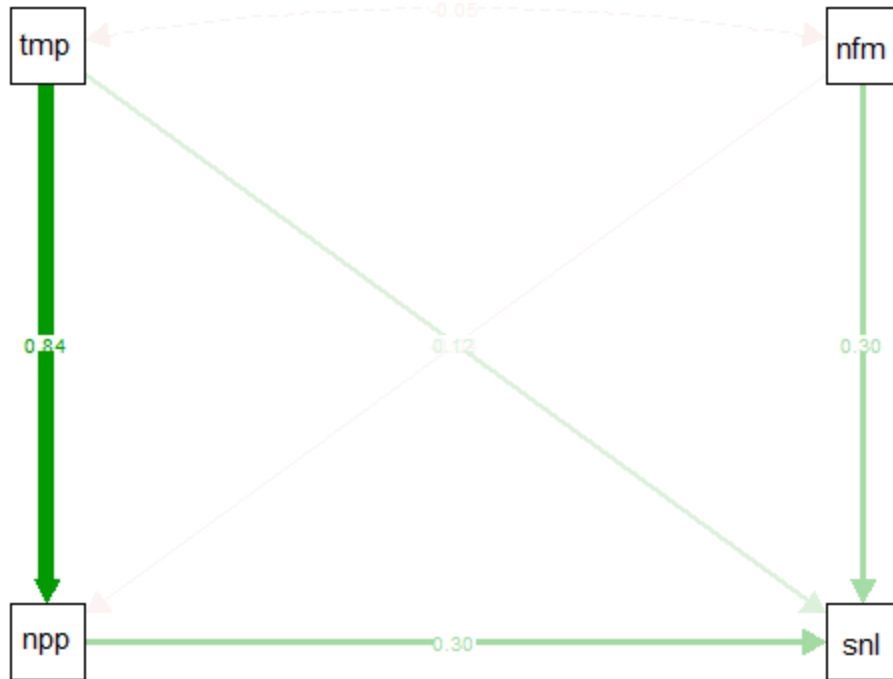

**Figure S4** A directed graph showing hypothesized relationships among responses potentially affecting snail size (snl). Snail size differences were likely the result of faster growth rates, and faster growth rates could be related to the number of perceived predators (number of females (nfm) since only female mosquitofish consume snails), the pond temperature (tmp), or the amount of primary production (npp; i.e. food resources). This analysis was based on standardized data from all treatments, performed in R using the package lavaan, and plotted using the package SEMplot. Temperature and NPP values were taken from week 2 while snail size wasn't measured until week 4; this was due to the fact that snail size was determined by growth in previous ecological conditions. P-values for each direct effect on snails size (i.e. parameter estimates for predictors in the underlying regressions) were not significant ( $\alpha=.10$ ) except for the effect of number of females on snail size ( $p=0.050$ ).



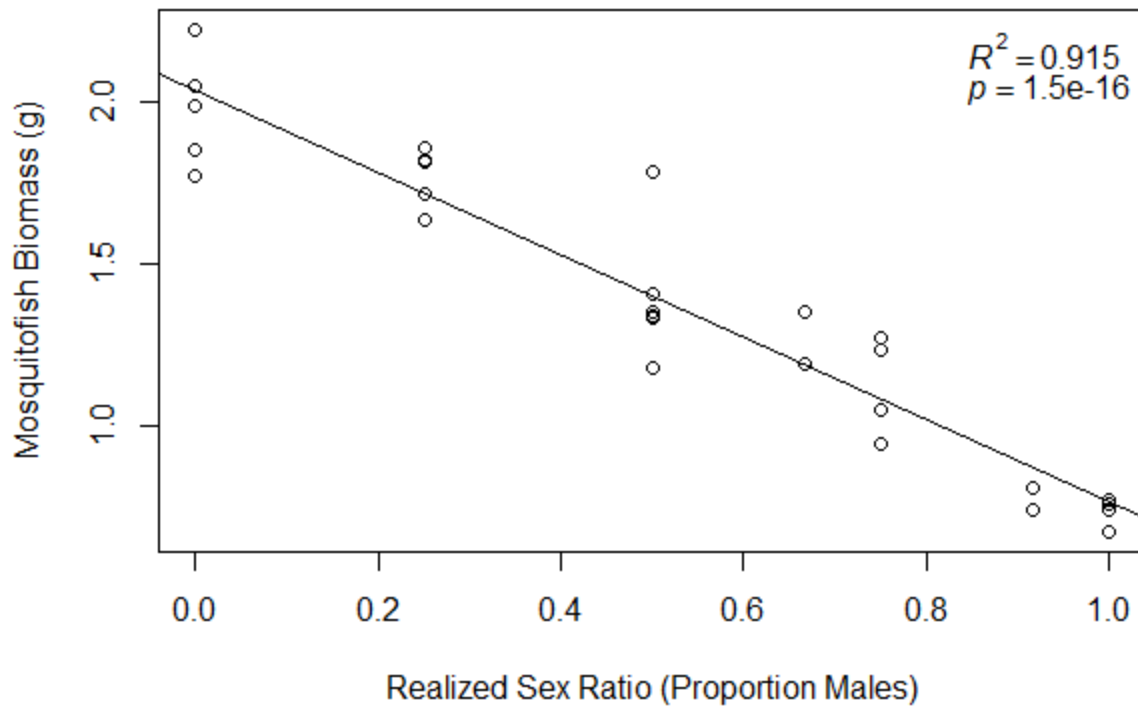

**Figure S5** Realized experimental sex ratio and total fish biomass were strongly linearly related. This strong collinearity ( $VIF > 10$ ) precluded multiple linear regression and ANCOVA.
